# Supplementary material
Source: JCI journal article supplement (doi:10.1172/jci200684)
Supplement: sd1 [file 1]

Full unedited gel for Figure 6D

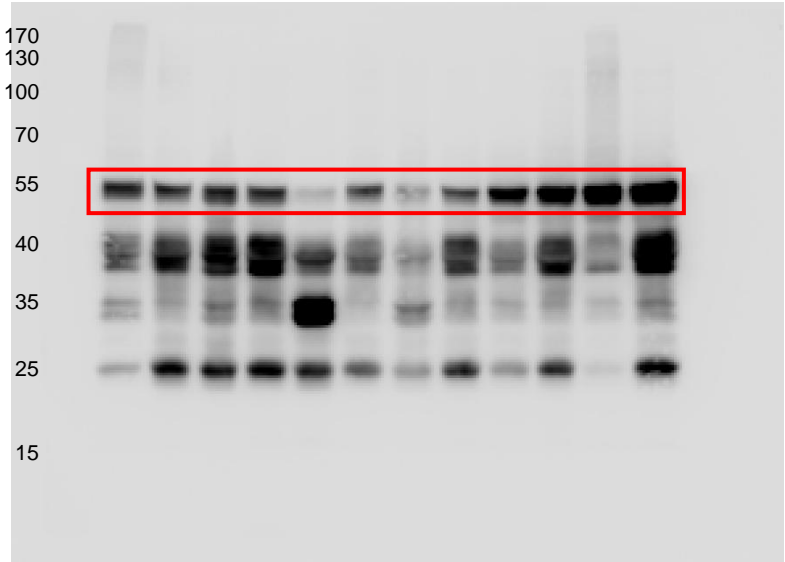

**pSmad1-5 Lung**

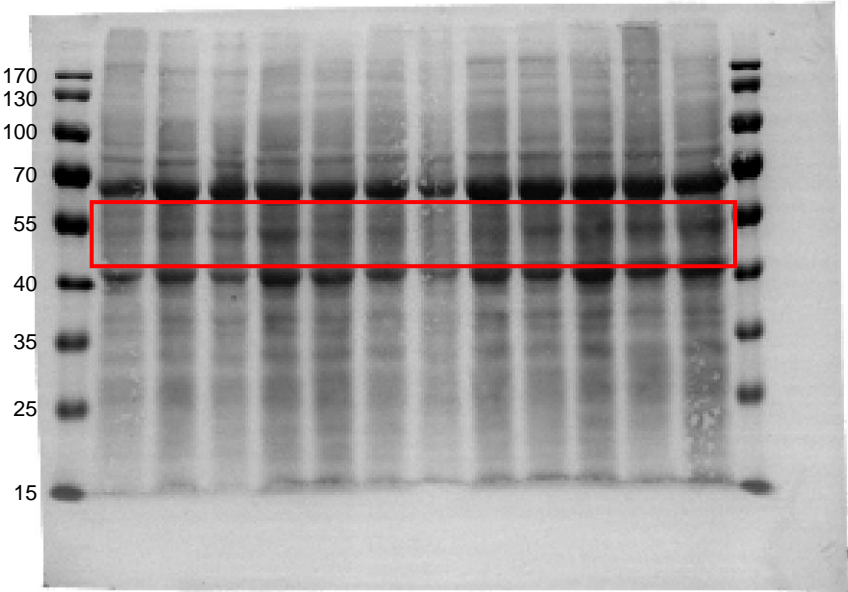

**pSmad1-5 Lung (mem code)**

**Full unedited gel for Figure 11D**

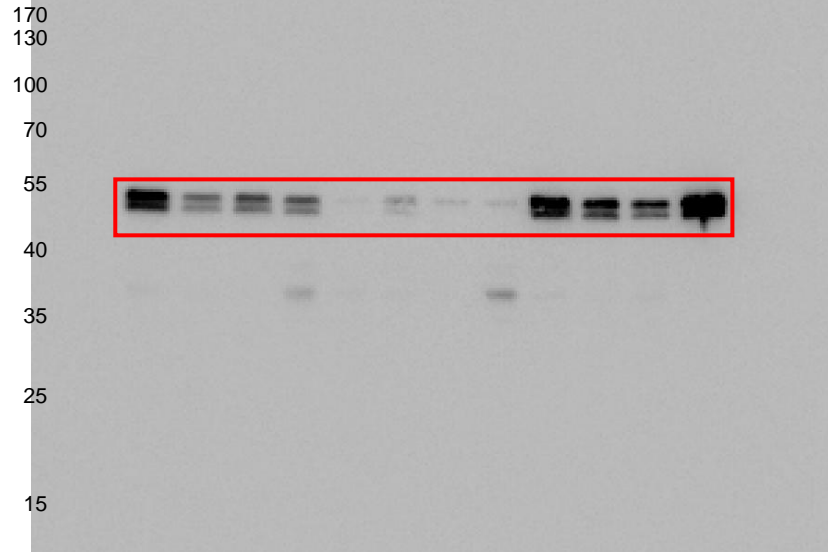

**pSmad1-5 RV**

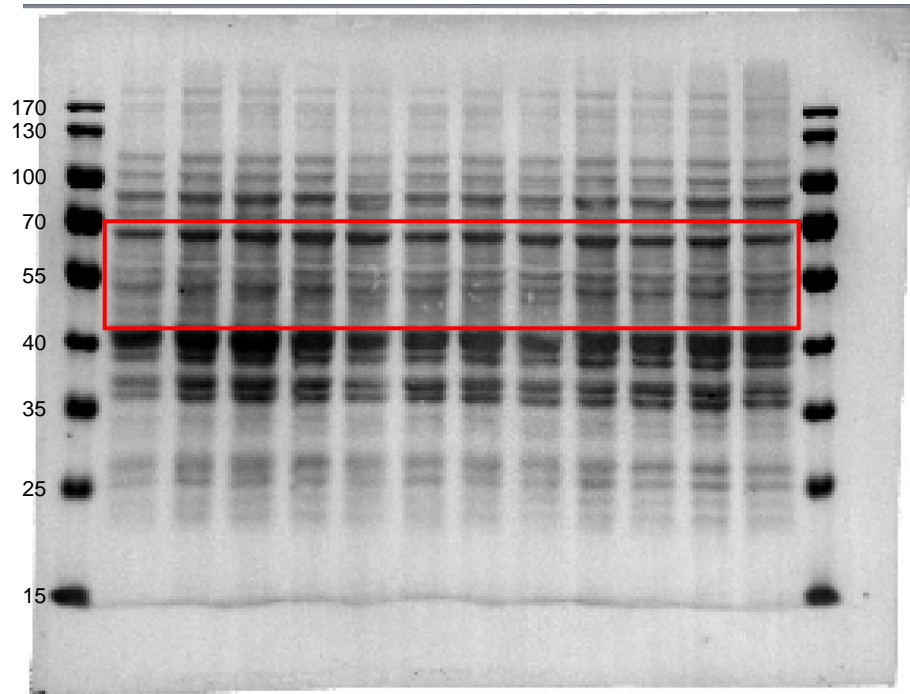

**pSmad1-5 RV mem code**

Full unedited gel for Figure 13E

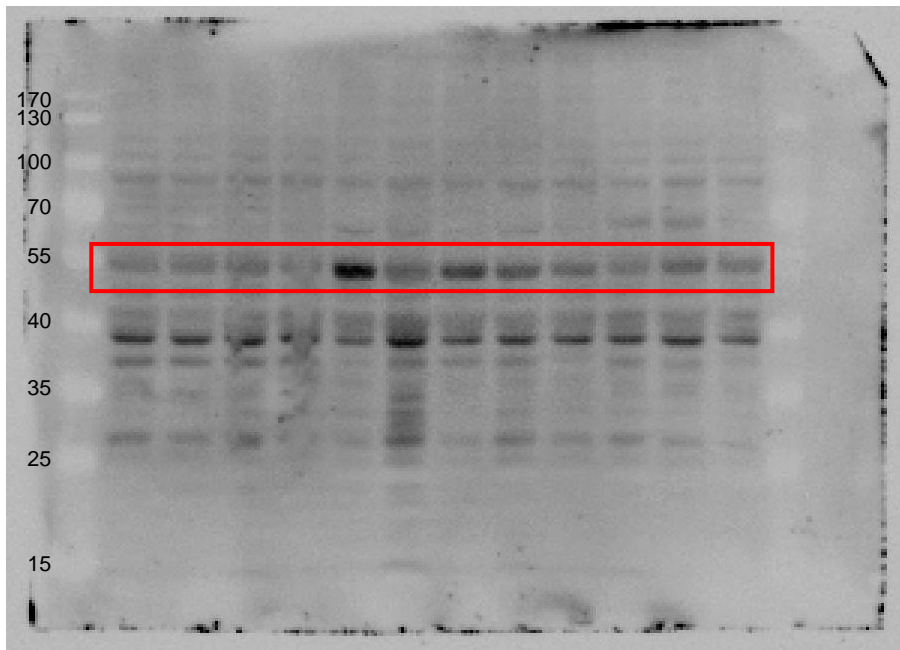

**PDK4 RV**

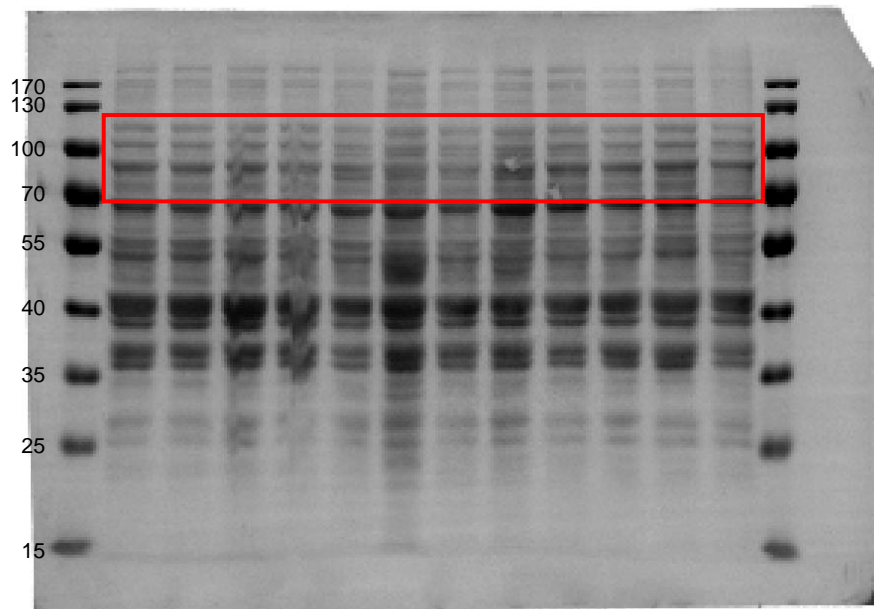

**PDK4 RV (mem code)**

# Full unedited gel for Figure S10A

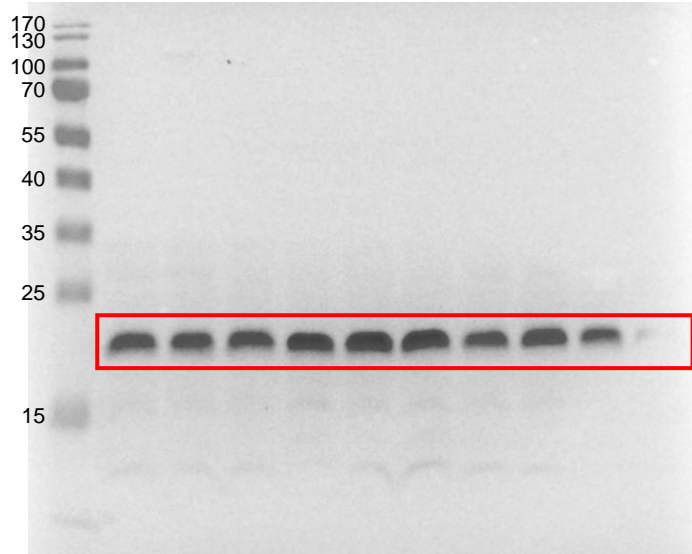

**Apelin Lung**

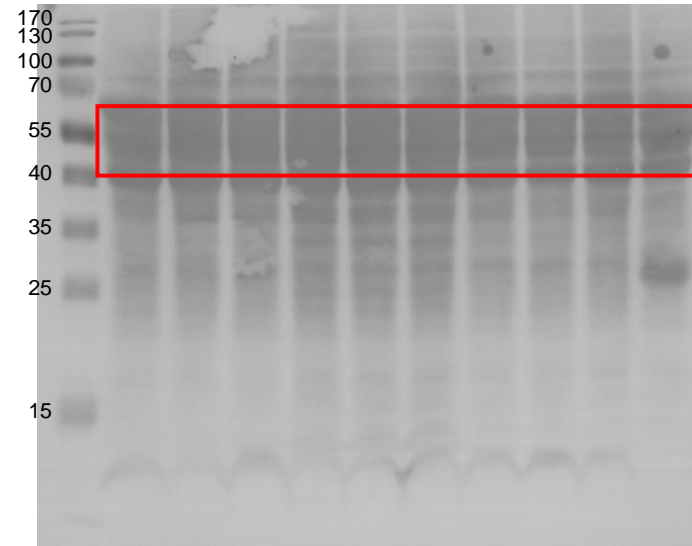

**Apelin Lung  
(mem code)**

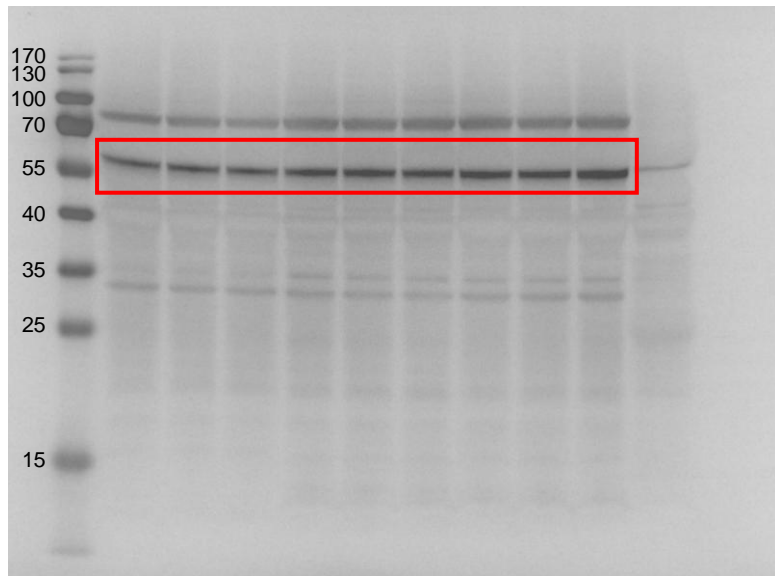

**Apelin Receptor  
Lung**

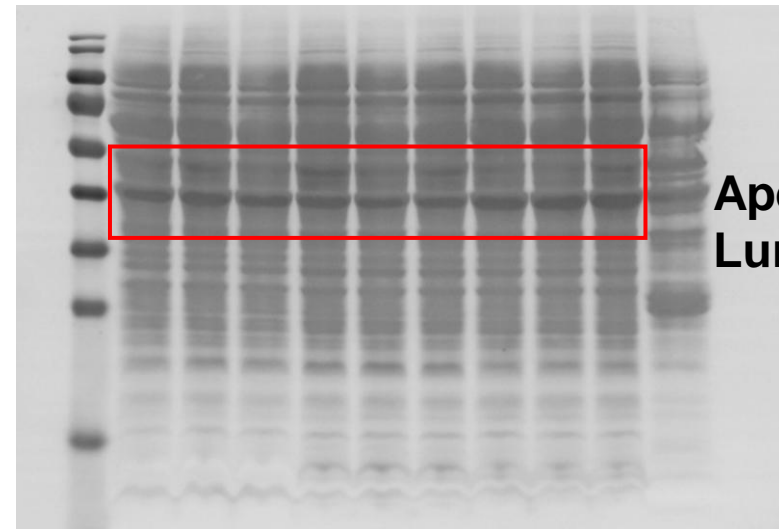

**Apelin Receptor  
Lung (mem code)**

# Full unedited gel for Figure S12A

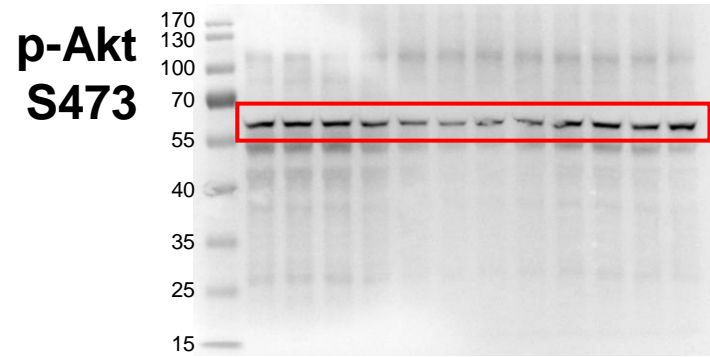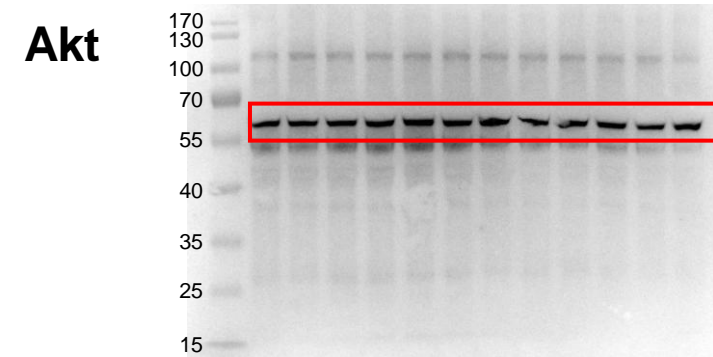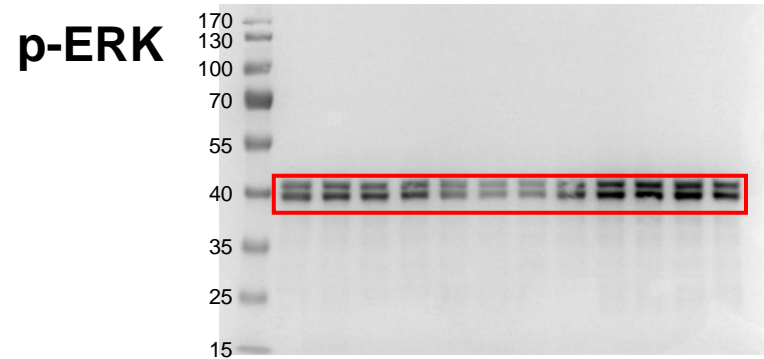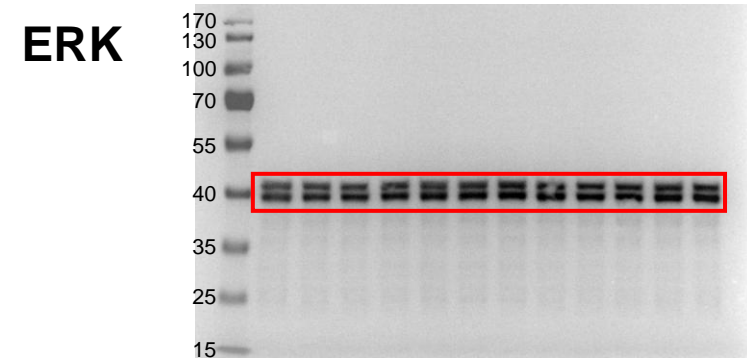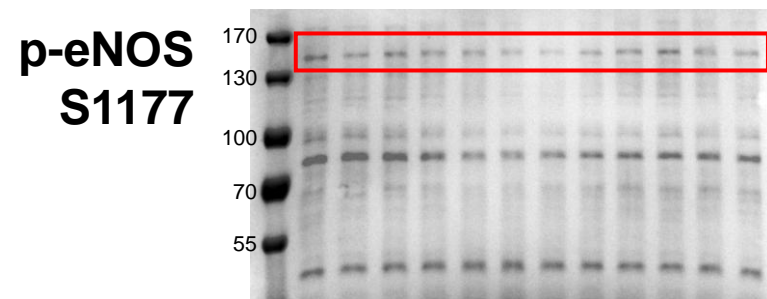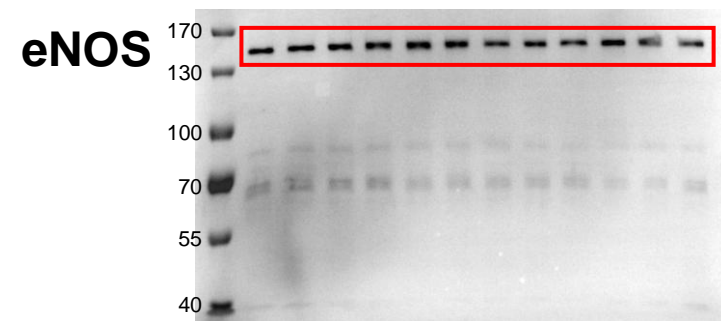

# Full unedited gel for Figure S15B

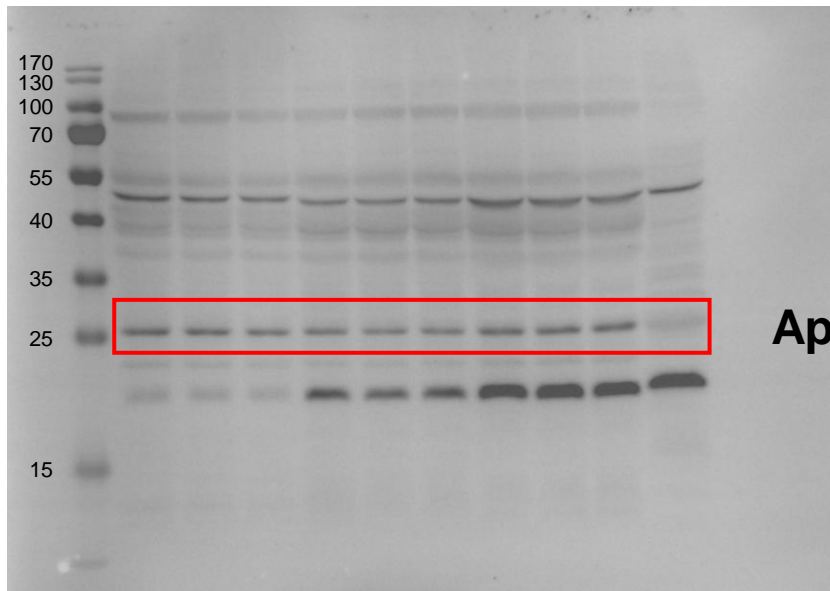

**Apelin RV**

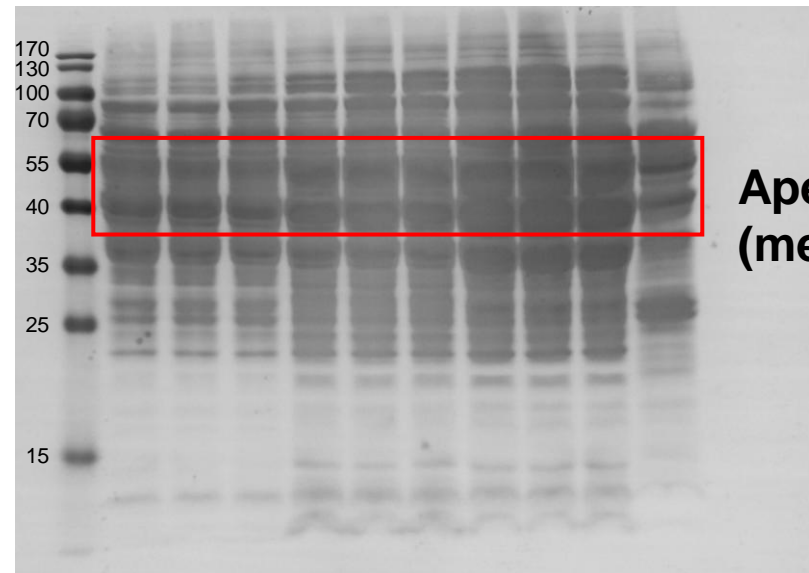

**Apelin RV  
(mem code)**

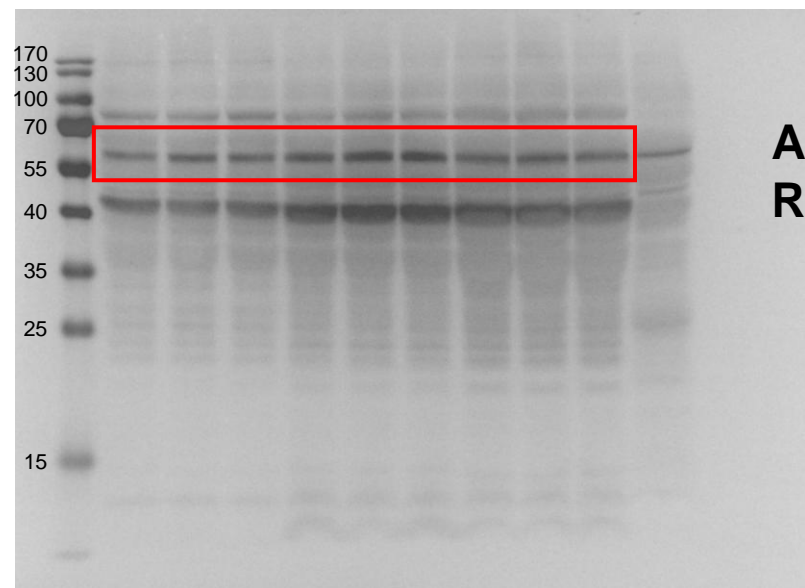

**Apelin receptor  
RV**

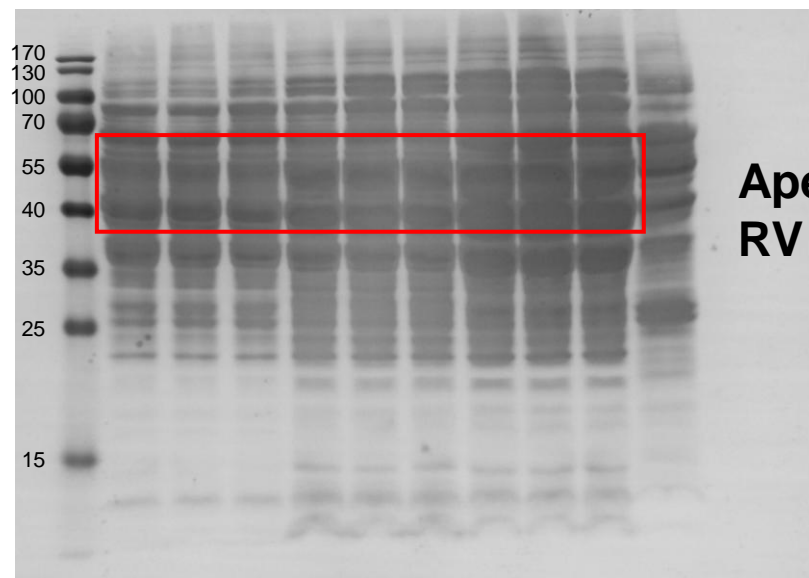

**Apelin receptor  
RV (mem code)**
